# Supplementary material
Source: Springer Nature journal article supplement (https://www.springermedizin.de/resource/supplementary/12916_2010_353_MOESM1_ESM.pdf/9599850)

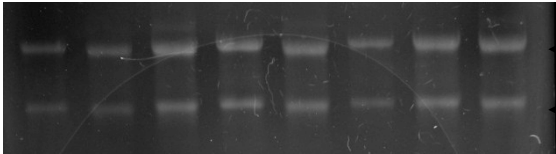

28S

18S

Supplement: MOESM1 [file 9599850]
